# Supplementary material
Source: publisher site journal article supplement (https://www.dovepress.com/article/531119)
Supplement: Supplementary file 1 [file Supplementary%20file%201_3_1.docx]

**Supplementary file 1. Cesarean section maternal intraoperative shivering questionnaire**

Name: _______________ ID: _______________

Intraoperative Shivering: □ Yes □ No

1. Age: _______________ years
2. BMI: _______________ kg/m²
3. Gestational Weeks at Delivery: _______________ weeks
4. Primiparous: □ Yes □ No
5. History of Abortion: □ Yes □ No
6. Baseline Body Temperature: _______________ °C
7. Systolic Blood Pressure (SBP): _______________ mmHg

Diastolic Blood Pressure (DBP): _______________ mmHg

Mean Arterial Pressure (MAP): _______________ mmHg

1. Heart Rate (HR): _______________ beats/min
2. Preoperative Fasting: □ Yes □ No
3. Preoperative Pain Score: _______________ (Scale, e.g., 0-10)
4. Comorbid Gestational Hypertension: □ Yes □ No
5. Comorbid Gestational Diabetes Mellitus (GDM): □ Yes □ No
6. Comorbid Gestational Subclinical Hypothyroidism: □ Yes □ No
7. Emergency Admission: □ Yes □ No
8. Premature Rupture of Membranes (PROM): □ Yes □ No
9. Scarred Uterus: □ Yes □ No
10. Operating Room Temperature: _______________ °C
11. ASA Classification: □ I □ II □ III □ IV
12. Anesthetic Block Level: □ < T8 □ ≥ T8
13. Active Warming Employed: □ Yes □ No
14. Intraoperative Oxytocin Administration: □ Yes □ No
15. Duration of Surgery: _______________ minutes
16. Duration of Anesthesia: _______________ minutes
17. Time from Incision to Delivery: _______________ minutes
18. Intraoperative Fluid Volume Administered: _______________ mL
19. Estimated Intraoperative Blood Loss: _______________ mL
20. Medication Used for Shivering Relief:

□ None

□ Dexmedetomidine

□ Esketamine

□ Nalbuphine

□ Tramadol

□ Fentanyl

□ Sufentanil

□ Ondansetron

□ Phenylephrine

□ Pethidine

□ Magnesium Sulfate

□ Other: _______________

Supplementary file 2. Assignment of independent variables

| Independent variable | Variable description | Assignment of values |
| --- | --- | --- |
| BMI (kg/m2) | Input with original value |  |
| Baseline body temperature (℃) | Input with original value |  |
| Preoperative pain score (points) | Input with original value |  |
| Gestational hypothyroidism | Categorical variable | “No”=0，“Yes”=1 |
| Emergency admission | Categorical variable | “No”=0，“Yes”=1 |
| Premature rupture of membranes | Categorical variable | “No”=0，“Yes”=1 |
| Operating room temperature (℃) | Input with original value |  |
| ASA classification | Categorical variable | “Level II”=0，“Level III”=1 |
| Anesthesia block level | Categorical variable | “<T8”=0,“≥T8”=1 |
| Implementation of active warming measures | Categorical variable | “Yes”=0，“No”=1 |
| Duration of surgery (min) | Input with original value |  |
| Duration of anesthesia (min) | Input with original value |  |
| Fetal delivery time (min) | Input with original value |  |
| Intraoperative fluid volume (mL) | Input with original value |  |
| Intraoperative blood loss (mL) | Input with original value |  |
